# Supplementary material for: Liver X Receptor ligand cytotoxicity in colon cancer cells and not in normal colon epithelial cells depends on LXRβ subcellular localization
Source: PubMed Central journal article supplement (PMC4694942; doi:10.18632/oncotarget.5791), 2015-09-22
Supplement: oncotarget-06-26651-s001.pdf [file oncotarget-06-26651-s001.pdf]

**Liver X Receptor ligand cytotoxicity in colon cancer cells and not in normal colon epithelial cells depends on LXR $\beta$  subcellular localization**

**Supplementary Material**

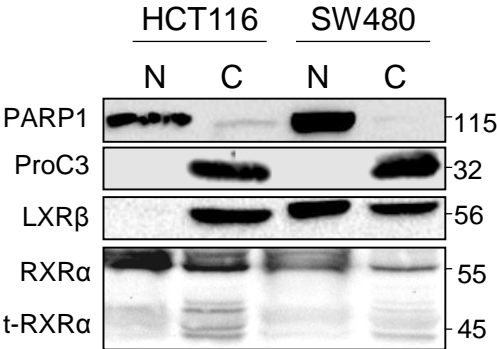

**Supplementary Figure 1: Subcellular localization of LXR $\beta$ , RXR $\alpha$  and t-RXR $\alpha$ .** Western blot analysis of LXR $\beta$ , RXR $\alpha$  and t-RXR $\alpha$  protein expression in HCT116 and SW480 human colon cancer cell lines. PARP1 and Procaspase-3 were used as a nuclear or cytoplasmic fraction control respectively. Numbers indicate molecular masses in kilodaltons. N = Nuclear fraction and C = cytoplasmic fraction.

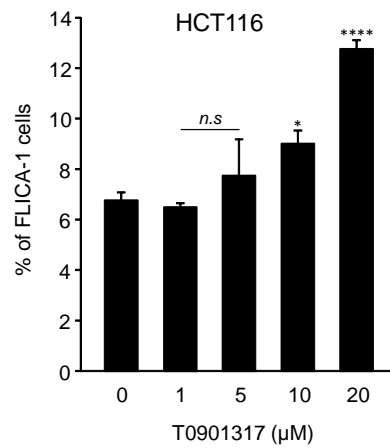

**Supplementary Figure 2: LXR ligand induces caspase-1 activation.** HCT116 cells were treated with indicated concentrations of T0901317 for 1 hour. Caspase-1 activation was determined using FLICA-1. Mean of three independent experiments  $\pm$  s.d.. Statistics compare cells treated with T0901317 with untreated cells: \*  $p < 0.01$ , \*\*\*\*  $p < 0.0001$ , n.s., not significant using two tailed t test.

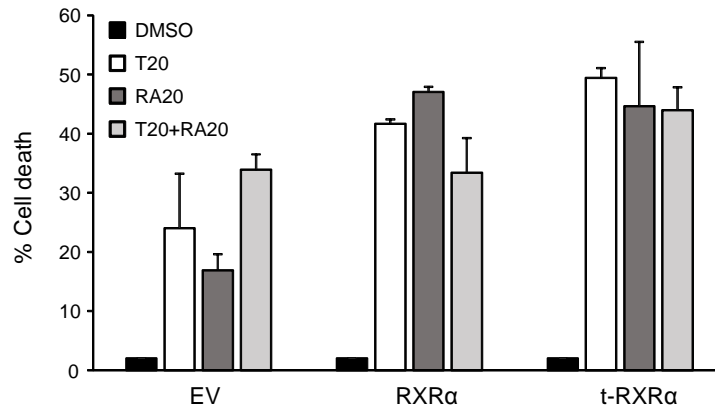

**Supplementary Figure 3: Effects of RXR $\alpha$  and t-RXR $\alpha$  overexpression on LXR and RXR ligand toxicities.** SW620 cells were transiently transfected with empty vector (EV) or plasmids coding for RXR $\alpha$  or t-RXR $\alpha$ . Cells were then treated either with 20 $\mu$ M of T0901317 (T20-white bars) or 20 $\mu$ M of 9-cisRA (RA20-dark grey bars) or both (T20+RA20-light grey bars) or DMSO (black bars). One representative experiment out of three.

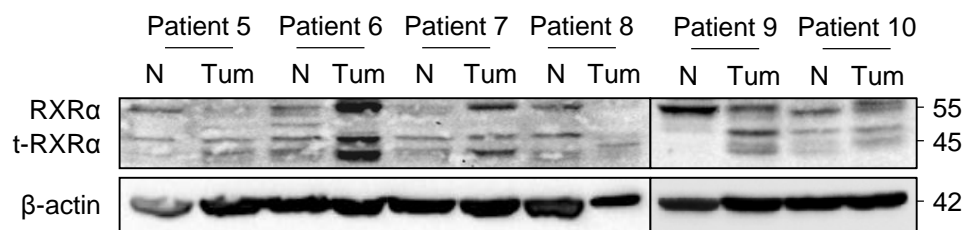

**Supplementary Figure 4: RXR $\alpha$  and t-RXR $\alpha$  expression in normal and tumor samples from colon cancer patients.** Western blot analysis of RXR $\alpha$  and t-RXR $\alpha$  protein expression in Tumoral (Tum) or healthy peripheral Non-Tumoral (N) tissues from colon cancer patients.  $\beta$ -Actin was used as a loading control. Numbers indicate molecular masses in kilodaltons.

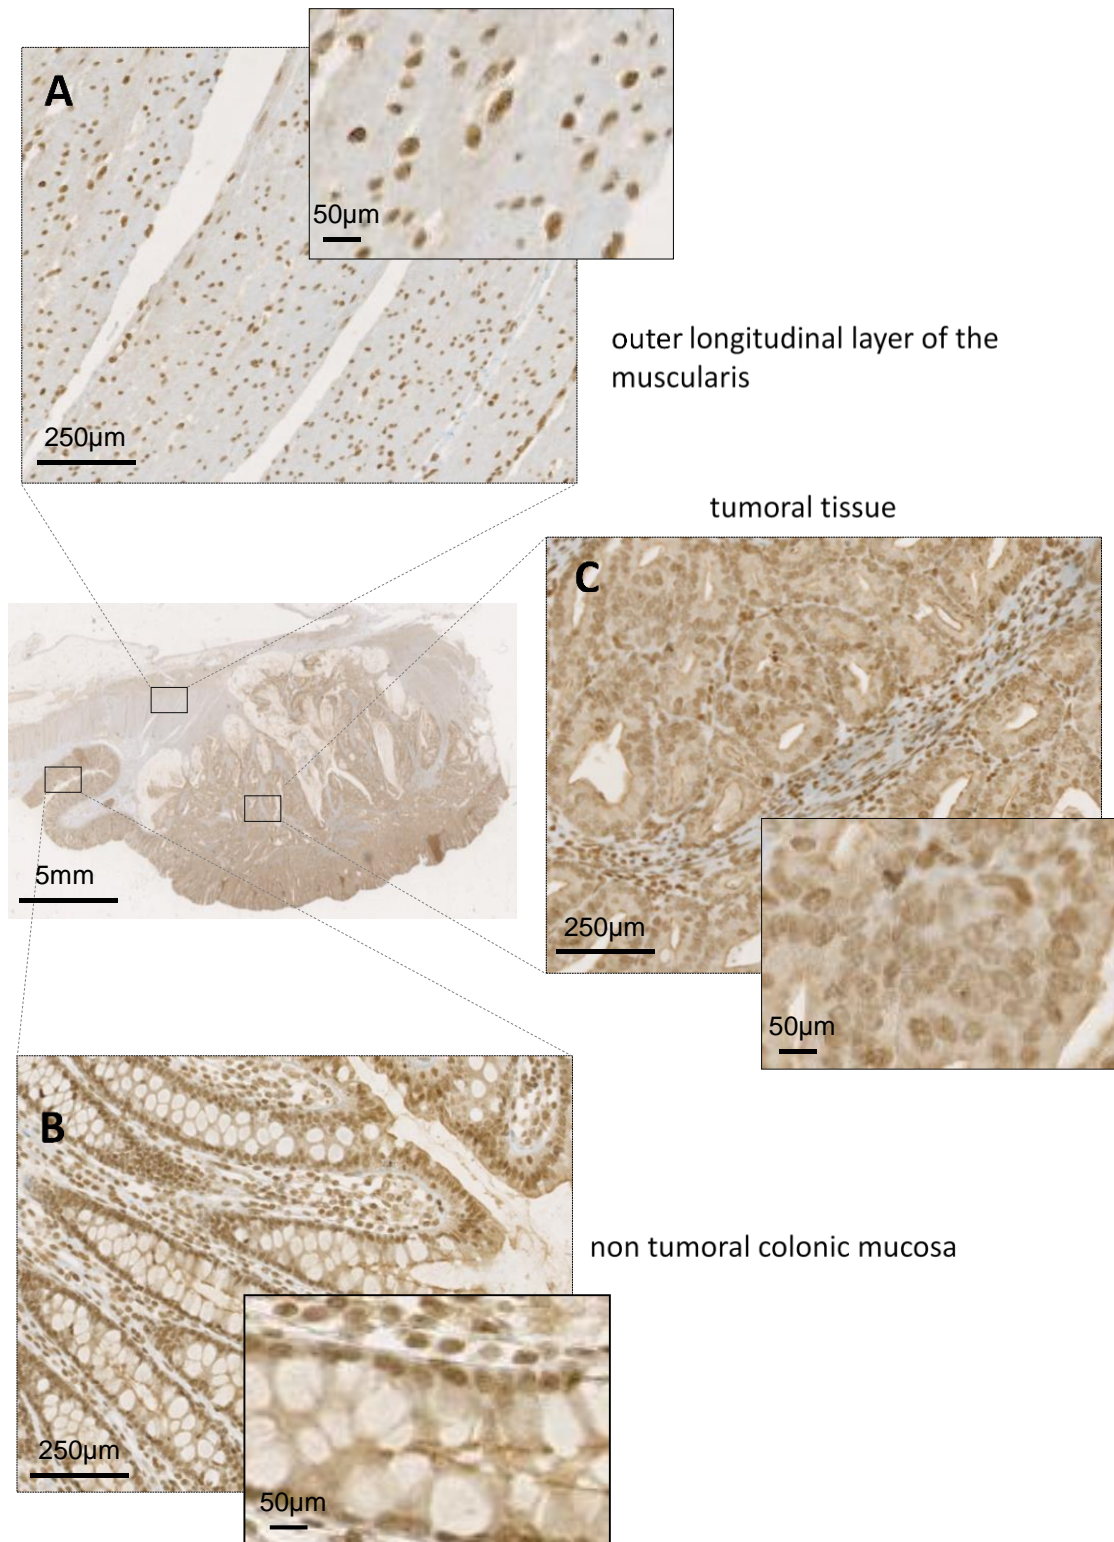

**Supplementary Figure 5: LXR $\beta$  localization in normal and tumor samples from colon cancer patients.** Example of immunohistochemical staining of LXR $\beta$  on human colon cancer patient samples. Localization of the different areas studied = upper: muscularis; middle = tumoral tissue; lower = non-tumoral colonic mucosa. One representative patient out of ten.

**SUPPLEMENTARY MOVIES: Subcellular localization of LXR $\beta$ -RXR $\alpha$  or LXR $\beta$ -t-RXR $\alpha$  interactions.** PLA between LXR $\beta$  and GFP-RXR $\alpha$  or GFP-t-RXR $\alpha$ . The Z-stacks from the image in Figure 4e were compiled into a 3-dimensional image and rotated in a movie.

## **SUPPLEMENTARY MATERIAL AND METHODS**

### **Nuclear and cytoplasmic fraction isolation**

Cells were incubated in hypotonic buffer (20 mM Hepes pH7.5, 10mM KCl, 1.5mM MgCl<sub>2</sub>, 1mM EDTA, 1mM EGTA, 250mM sucrose) in the presence of complete protease inhibitor mixture for 30 min. on ice. Then cells were passed through a 26G needle and centrifuged at 1000g for 10 min. at 4°C. The pellet correspond to the nuclear fraction and the supernatant to the cytoplasmic fraction. Lysates were then analysed by western blotting. Anti-Caspase-3 (8G10) from Cell Signaling (Saint Quentin Yvelines) and anti-PARP-1 from Santa cruz biotechnology antibodies were used.
